# Supplementary material for: A Psychophysical Imaging Method Evidencing Auditory Cue Extraction during Speech Perception: A Group Analysis of Auditory Classification Images
Source: PLoS One. 2015 Mar 17;10(3):e0118009. doi: 10.1371/journal.pone.0118009 (PMC4364617; doi:10.1371/journal.pone.0118009)
Supplement: S1 Table — (XLSX) [file pone.0118009.s001.xlsx]

## Sheet: Feuil1
Subject number	Gender	Age (years)	Handedness (Edinburgh test)	Raven’s Standard Progressive Matrices (score /60)	Reading age (L'Alouette MCLM)	Phoneme deletion (score /10)	Phoneme deletion (time in s)	Spoonerism (score /20)	Spoonerism (time in s)	Spelling, sentences:orthography (score /10)	Spelling, sentences: grammar (s/10)	Reading, regular words (score /20)	Reading, regular words (time in s)	Reading, irregular words (score /20)	Reading, irregular words (time in s)	Reading, pseudowords (score /20)	Reading, pseudowords (time in s)	Spelling, regular words (score /10)	Spelling, regular words (time in s)	Spelling, irregular words (score /10)	Spelling, irregular words (time in s)	Spelling, pseudowords (score /10)	Spelling, pseudowords (time in s)	Pseudowords repetition (score /20)	Memory span, forward digit	Memory span, backward digit	ANT alerting effect	ANT orienting effect	ANT conflict effect	Audiogram: 125 Hz, left ear	Audiogram: 250 Hz, left ear	Audiogram: 500 Hz, left ear	Audiogram: 750 Hz, left ear	Audiogram: 1000 Hz, left ear	Audiogram: 1500 Hz, left ear	Audiogram: 2000 Hz, left ear	Audiogram: 3000 Hz, left ear	Audiogram: 4000 Hz, left ear	Audiogram: 6000 Hz, left ear	Audiogram: 8000 Hz, left ear	Audiogram: 125 Hz, right ear	Audiogram: 250 Hz, right ear	Audiogram: 500 Hz, right ear	Audiogram: 750 Hz, right ear	Audiogram: 1000 Hz, right ear	Audiogram: 1500 Hz, right ear	Audiogram: 2000 Hz, right ear	Audiogram: 3000 Hz, right ear	Audiogram: 4000 Hz, right ear
S6	F	22	80	51	156	10	22	20	52	9	10	20	14	20	14	20	23	9	44	6	43	10	48	20	8	8	41	36	128	10	5	5	10	5	10	5	-5	5	5	5	5	5	10	5	10	15	5	-5	0
S11	M	20	90	58	180	10	26	16	58	9	9	20	10	20	9	18	14	8	52	7	47	10	42	20	7	6	45	80	105	0	0	0	10	0	0	-5	0	-5	10	-5	5	5	10	15	10	0	5	0	-5
S14	F	20	90	48	171	5	35	20	63	10	8	20	15	18	16	20	16	9	40	8	42	9	40	19	8	6	85	21	158	5	15	5	15	10	10	0	10	10	10	5	10	15	10	10	5	0	0	15	20
S16	M	21	50	54	226	10	27	20	47	10	9	20	9	18	14	20	13	10	31	10	32	8	41	20	9	8	44	34	97	15	10	5	10	5	0	0	0	0	10	15	0	5	5	5	0	0	0	0	0
S17	F	22	100	46	167	10	25	19	126	9	9	20	15	19	11	20	21	9	36	8	36	9	46	20	6	5	-5	26	123	10	10	10	15	10	10	0	5	10	15	5	15	10	10	10	10	5	5	5	10
S18	F	21	100	54	177	10	30	19	67	8	8	20	12	18	13	10	21	10	41	6	67	10	52	20	8	6	26	36	132	5	10	10	10	5	5	0	0	0	10	5	5	5	5	5	5	5	5	0	-5
S19	F	24	80	49	183	10	34	19	93	9	8	20	13	18	15	18	22	9	37	9	34	10	42	19	7	5	43	46	134	5	5	5	15	10	5	5	5	15	0	0	5	5	5	10	10	5	10	10	10
S20	F	20	90	43	163	10	22	20	37	9	9	20	11	20	16	19	20	10	33	8	40	10	40	20	8	8	20	65	144	0	0	0	10	5	0	5	0	0	5	5	0	0	5	10	5	5	0	0	0
S21	F	33	90	50	187	10	24	18	82	10	8	20	12	20	13	19	18	9	32	8	31	10	40	19	6	5	67	78	132	15	15	15	10	10	5	0	0	0	-5	0	10	15	20	15	15	0	0	5	0
S22	M	35	-100	42	152	10	24	20	64	10	9	19	16	19	13	20	20	9	41	9	41	10	50	18	6	5	28	42	70	5	15	15	15	10	10	10	15	0	10	20	5	15	15	15	10	5	10	5	5
S23	M	19	100	57	197	10	26	19	65	9	9	20	12	19	10	18	22	8	45	5	48	10	49	19	7	5	18	36	245	5	10	10	10	10	10	0	10	10	10	15	10	20	20	20	15	5	5	10	5
S24	F	22	100	53	203	6	50	18	56	10	9	20	11	19	18	19	16	9	36	5	38	10	39	20	6	6	57	-15	220	5	10	15	15	10	10	5	0	-5	10	15	0	10	10	10	10	5	0	5	0
S25	F	21	60	47	176	10	22	19	48	10	9	19	12	19	11	19	21	10	39	9	49	10	37	20	9	8	41	13	148	5	5	10	10	10	0	5	-5	0	10	10	5	5	5	5	0	0	5	-5	0
S26	F	20	100	49	174	10	38	20	59	9	8	20	11	20	10	20	19	9	36	8	52	9	39	20	6	6	37	18	180	0	10	5	5	10	5	10	5	10	-5	5	-5	0	5	5	10	10	10	5	10
S27	F	20	80	49	231	10	31	19	85	10	8	19	10	18	12	18	16	10	44	9	47	8	51	19	7	6	21	36	119	0	10	10	15	10	5	-5	5	0	0	-5	0	5	10	10	20	5	5	10	0
S28	F	22	-60	50	207	10	20	19	69	10	8	20	12	20	11	19	17	10	41	8	45	10	49	18	6	4	26	85	130	5	5	10	15	15	0	0	5	10	10	15	5	15	10	15	10	-5	-5	0	0
S29	F	21	50	56	206	9	23	20	38	9	8	19	10	20	10	20	15	8	39	6	44	10	47	20	8	8	-5	59	103	10	15	15	15	15	10	10	10	10	20	15	5	10	15	15	15	5	0	15	20
[truncated: 2 more columns]
